# Supplementary material for: Radical copolymerisation of chlorotrifluoroethylene with isobutyl vinyl ether initiated by the persistent perfluoro-3-ethyl-2,4-dimethyl-3-pentyl radical
Source: Royal Society of Chemistry journal article supplement (doi:10.1039/c5ra05066a), 2015-01-01
Supplement: c5ra05066a1.pdf [file c5ra05066a1.pdf]

## Supplementary Information

### Radical copolymerisation of chlorotrifluoroethylene with isobutyl vinyl ether initiated by the persistent perfluoro-3-ethyl-2,4-dimethyl-3-pentyl radical

G. J. Puts<sup>a</sup>, G. Lopez<sup>b</sup>, T. Ono<sup>c</sup>, P. L. Crouse<sup>a</sup> and B. M. Ameduri<sup>b\*</sup>

#### Thermogravimetric Analysis

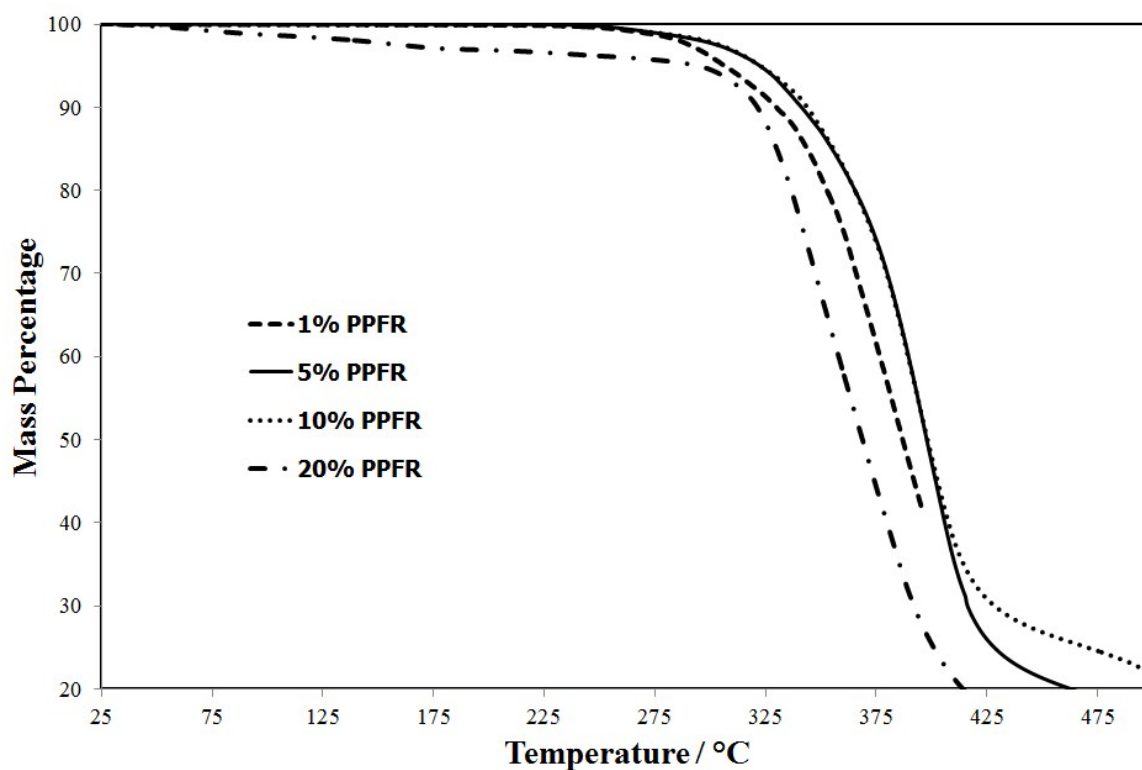

**Figure 1** : TGA thermograms for the poly(CTFE-*alt*-iBVE) copolymers under air at 10 °C/min.

---
